# Supplementary material for: Multi-year presence of humpback whales in the Atlantic sector of the Southern Ocean but not during El Niño
Source: PubMed Central journal article supplement (PMC8233365; doi:10.1038/s42003-021-02332-6), 2021-06-25
Supplement: 42003_2021_2332_MOESM3_ESM.pdf [file 42003_2021_2332_MOESM3_ESM.pdf]

## Reporting Summary

Nature Research wishes to improve the reproducibility of the work that we publish. This form provides structure for consistency and transparency in reporting. For further information on Nature Research policies, see our [Editorial Policies](#) and the [Editorial Policy Checklist](#).

### Statistics

For all statistical analyses, confirm that the following items are present in the figure legend, table legend, main text, or Methods section.

n/a Confirmed

- |                                     |                                     |                                                                                                                                                                                                                                                            |
|-------------------------------------|-------------------------------------|------------------------------------------------------------------------------------------------------------------------------------------------------------------------------------------------------------------------------------------------------------|
| <input type="checkbox"/>            | <input checked="" type="checkbox"/> | The exact sample size ( $n$ ) for each experimental group/condition, given as a discrete number and unit of measurement                                                                                                                                    |
| <input type="checkbox"/>            | <input checked="" type="checkbox"/> | A statement on whether measurements were taken from distinct samples or whether the same sample was measured repeatedly                                                                                                                                    |
| <input type="checkbox"/>            | <input checked="" type="checkbox"/> | The statistical test(s) used AND whether they are one- or two-sided<br><i>Only common tests should be described solely by name; describe more complex techniques in the Methods section.</i>                                                               |
| <input checked="" type="checkbox"/> | <input type="checkbox"/>            | A description of all covariates tested                                                                                                                                                                                                                     |
| <input checked="" type="checkbox"/> | <input type="checkbox"/>            | A description of any assumptions or corrections, such as tests of normality and adjustment for multiple comparisons                                                                                                                                        |
| <input checked="" type="checkbox"/> | <input type="checkbox"/>            | A full description of the statistical parameters including central tendency (e.g. means) or other basic estimates (e.g. regression coefficient) AND variation (e.g. standard deviation) or associated estimates of uncertainty (e.g. confidence intervals) |
| <input type="checkbox"/>            | <input checked="" type="checkbox"/> | For null hypothesis testing, the test statistic (e.g. $F$ , $t$ , $r$ ) with confidence intervals, effect sizes, degrees of freedom and $P$ value noted<br><i>Give <math>P</math> values as exact values whenever suitable.</i>                            |
| <input checked="" type="checkbox"/> | <input type="checkbox"/>            | For Bayesian analysis, information on the choice of priors and Markov chain Monte Carlo settings                                                                                                                                                           |
| <input checked="" type="checkbox"/> | <input type="checkbox"/>            | For hierarchical and complex designs, identification of the appropriate level for tests and full reporting of outcomes                                                                                                                                     |
| <input checked="" type="checkbox"/> | <input type="checkbox"/>            | Estimates of effect sizes (e.g. Cohen's $d$ , Pearson's $r$ ), indicating how they were calculated                                                                                                                                                         |

*Our web collection on [statistics for biologists](#) contains articles on many of the points above.*

### Software and code

Policy information about [availability of computer code](#)

Data collection

Data analysis http://dcs.who.edu/lfdfs\_manual/lfdfs\_manual.html). The detection output was filtered in MATLAB. The manual post-processing of the detections was conducted in Raven Pro 1.6 (<https://ravensoundsoftware.com/software/raven-pro/>). Statistical analysis was conducted in R (<https://www.R-project.org/>).

For manuscripts utilizing custom algorithms or software that are central to the research but not yet described in published literature, software must be made available to editors and reviewers. We strongly encourage code deposition in a community repository (e.g. GitHub). See the Nature Research [guidelines for submitting code & software](#) for further information.

### Data

Policy information about [availability of data](#)

All manuscripts must include a [data availability statement](#). This statement should provide the following information, where applicable:

- Accession codes, unique identifiers, or web links for publicly available datasets
- A list of figures that have associated raw data
- A description of any restrictions on data availability

Acoustic presence data: <https://datadryad.org/stash/share/p7jYUrL-GX0It3cDw29k5Ff3HBbhrKNrBxuCO2X7X00>.  
 Sea ice data: <https://www.mathworks.com/matlabcentral/fileexchange/50126-daily-antarctic-sea-ice-concentration>  
 ONI data: <https://catalog.data.gov/dataset/climate-prediction-center-cpcoceanic-nino-index>  
 SAM data: <https://climatedataguide.ucar.edu/climate-data/marshall-southern-annular-mode-sam-index-station-based>

## Field-specific reporting

Please select the one below that is the best fit for your research. If you are not sure, read the appropriate sections before making your selection.

Life sciences  Behavioural & social sciences  Ecological, evolutionary & environmental sciences

For a reference copy of the document with all sections, see [nature.com/documents/nr-reporting-summary-flat.pdf](https://www.nature.com/documents/nr-reporting-summary-flat.pdf)

## Ecological, evolutionary & environmental sciences study design

All studies must disclose on these points even when the disclosure is negative.

|                                   |                                                                                                                                                                                                                                                                                                                                                                                                                                                                                                                                                                                                                                                                                                                                                       |
|-----------------------------------|-------------------------------------------------------------------------------------------------------------------------------------------------------------------------------------------------------------------------------------------------------------------------------------------------------------------------------------------------------------------------------------------------------------------------------------------------------------------------------------------------------------------------------------------------------------------------------------------------------------------------------------------------------------------------------------------------------------------------------------------------------|
| Study description                 | Passive acoustic data were collected in the Southern Ocean with autonomous mooring systems. Recorders record various sound sources, but in this study only the vocalizations of humpback whales were considered.                                                                                                                                                                                                                                                                                                                                                                                                                                                                                                                                      |
| Research sample                   | 5 recording positions between 2010 and 2018                                                                                                                                                                                                                                                                                                                                                                                                                                                                                                                                                                                                                                                                                                           |
| Sampling strategy                 | Data collection depends on difficult logistics and problematic recovery of moorings in the Southern Ocean. All available data were included in the study.                                                                                                                                                                                                                                                                                                                                                                                                                                                                                                                                                                                             |
| Data collection                   | Stefanie Spiesecke prepared the recording devices for installation and mooring teams of the RV Polarstern deployed and recovered the moorings.                                                                                                                                                                                                                                                                                                                                                                                                                                                                                                                                                                                                        |
| Timing and spatial scale          | G1: 2010-12-11 to 2011-05-21; 2011-05-30 to 2011-05-30; 2011-06-14 to 2011-08-22; 2012-12-11 to 2013-07-13; 2016-12-22 to 2018-09-18;<br>G2: 2010-12-15 to 2011-06-18; 2012-12-14 to 2013-08-02; 2014-12-16 to 2016-05-19;<br>G3: 2010-12-16 to 2012-04-13; 2012-05-06 to 2012-09-17; 2013-01-07 to 2013-09-27;<br>G4: 2010-12-17 to 2012-02-05; 2012-02-28 to 2012-07-30; 2012-08-04 to 2012-08-09; 2012-08-11 to 2012-08-14; 2014-12-18 to 2016-05-28; 2016-12-26 to 2018-10-28;<br>G5: 2010-12-18 to 2012-05-09; 2012-06-01 to 2012-08-10; 2012-12-17 to 2013-05-28; 2013-06-19 to 2013-11-13; 2015-01-08 to 2015-01-26; 2015-02-14 to 2015-02-21; 2015-03-04 to 2015-08-24;<br>The acoustic range of the recording devices was estimated at 50km. |
| Data exclusions                   | no data were excluded                                                                                                                                                                                                                                                                                                                                                                                                                                                                                                                                                                                                                                                                                                                                 |
| Reproducibility                   | no experiments were conducted, acoustic and statistical analysis is reproducible                                                                                                                                                                                                                                                                                                                                                                                                                                                                                                                                                                                                                                                                      |
| Randomization                     | data were not grouped                                                                                                                                                                                                                                                                                                                                                                                                                                                                                                                                                                                                                                                                                                                                 |
| Blinding                          | data analysis was not blinded but data were analyzed by multiple experienced and unexperienced analysts independently.                                                                                                                                                                                                                                                                                                                                                                                                                                                                                                                                                                                                                                |
| Did the study involve field work? | <input checked="" type="checkbox"/> Yes <input type="checkbox"/> No                                                                                                                                                                                                                                                                                                                                                                                                                                                                                                                                                                                                                                                                                   |

## Field work, collection and transport

|                        |                                                                                                                                                                                                                                                        |
|------------------------|--------------------------------------------------------------------------------------------------------------------------------------------------------------------------------------------------------------------------------------------------------|
| Field conditions       | Southern Ocean climatic conditions: Varying among storms, heavy sea ice, calm sea.                                                                                                                                                                     |
| Location               | G1: 59 2.82 °S; 000 5.78 °E; 1007-1070m<br>G2: 63 59.85 °S; 000 1.84 °E; 970-1007m<br>G3: 66 2.01 °S; 000 3.12 °E ; 934-949m<br>G4: 66 30.71 °S; 000 1.51 °E; 859-1083m<br>G5: 68 59.94 °S; 000 4.38 °E; 958-999m                                      |
| Access & import/export | UBA (Umwelt Bundesamt) permits for RV Polarstern operation and mooring installation:<br>I 3.5 – 94003-3/271<br>I 3.5 – 94003-3/286<br>I 2.4 – 94003-3/271<br>I 2.4 – 94003-3/255<br>II 2.8 – 94003-3/324<br>II 2.8 – 94003-3/385<br>II 2.8 – 94033/137 |
| Disturbance            | RV Polarstern creates disturbance by generation of noise in the Southern Ocean ecosystem, however the ship is always maneuvered in a direct track to minimize disturbance.                                                                             |

# Reporting for specific materials, systems and methods

We require information from authors about some types of materials, experimental systems and methods used in many studies. Here, indicate whether each material, system or method listed is relevant to your study. If you are not sure if a list item applies to your research, read the appropriate section before selecting a response.

## Materials & experimental systems

| n/a                                 | Included in the study                                  |
|-------------------------------------|--------------------------------------------------------|
| <input checked="" type="checkbox"/> | <input type="checkbox"/> Antibodies                    |
| <input checked="" type="checkbox"/> | <input type="checkbox"/> Eukaryotic cell lines         |
| <input checked="" type="checkbox"/> | <input type="checkbox"/> Palaeontology and archaeology |
| <input checked="" type="checkbox"/> | <input type="checkbox"/> Animals and other organisms   |
| <input checked="" type="checkbox"/> | <input type="checkbox"/> Human research participants   |
| <input checked="" type="checkbox"/> | <input type="checkbox"/> Clinical data                 |
| <input checked="" type="checkbox"/> | <input type="checkbox"/> Dual use research of concern  |

## Methods

| n/a                                 | Included in the study                           |
|-------------------------------------|-------------------------------------------------|
| <input checked="" type="checkbox"/> | <input type="checkbox"/> ChIP-seq               |
| <input checked="" type="checkbox"/> | <input type="checkbox"/> Flow cytometry         |
| <input checked="" type="checkbox"/> | <input type="checkbox"/> MRI-based neuroimaging |
